# Supplementary material for: Multidrug-Resistant Acinetobacter baumannii May Cause Patients to Develop Polymicrobial Bloodstream Infection
Source: Hindawi journal article supplement (doi:10.1155/2022/8368578), 2022-06-24
Supplement: f1 [file 8368578.f1.pdf]

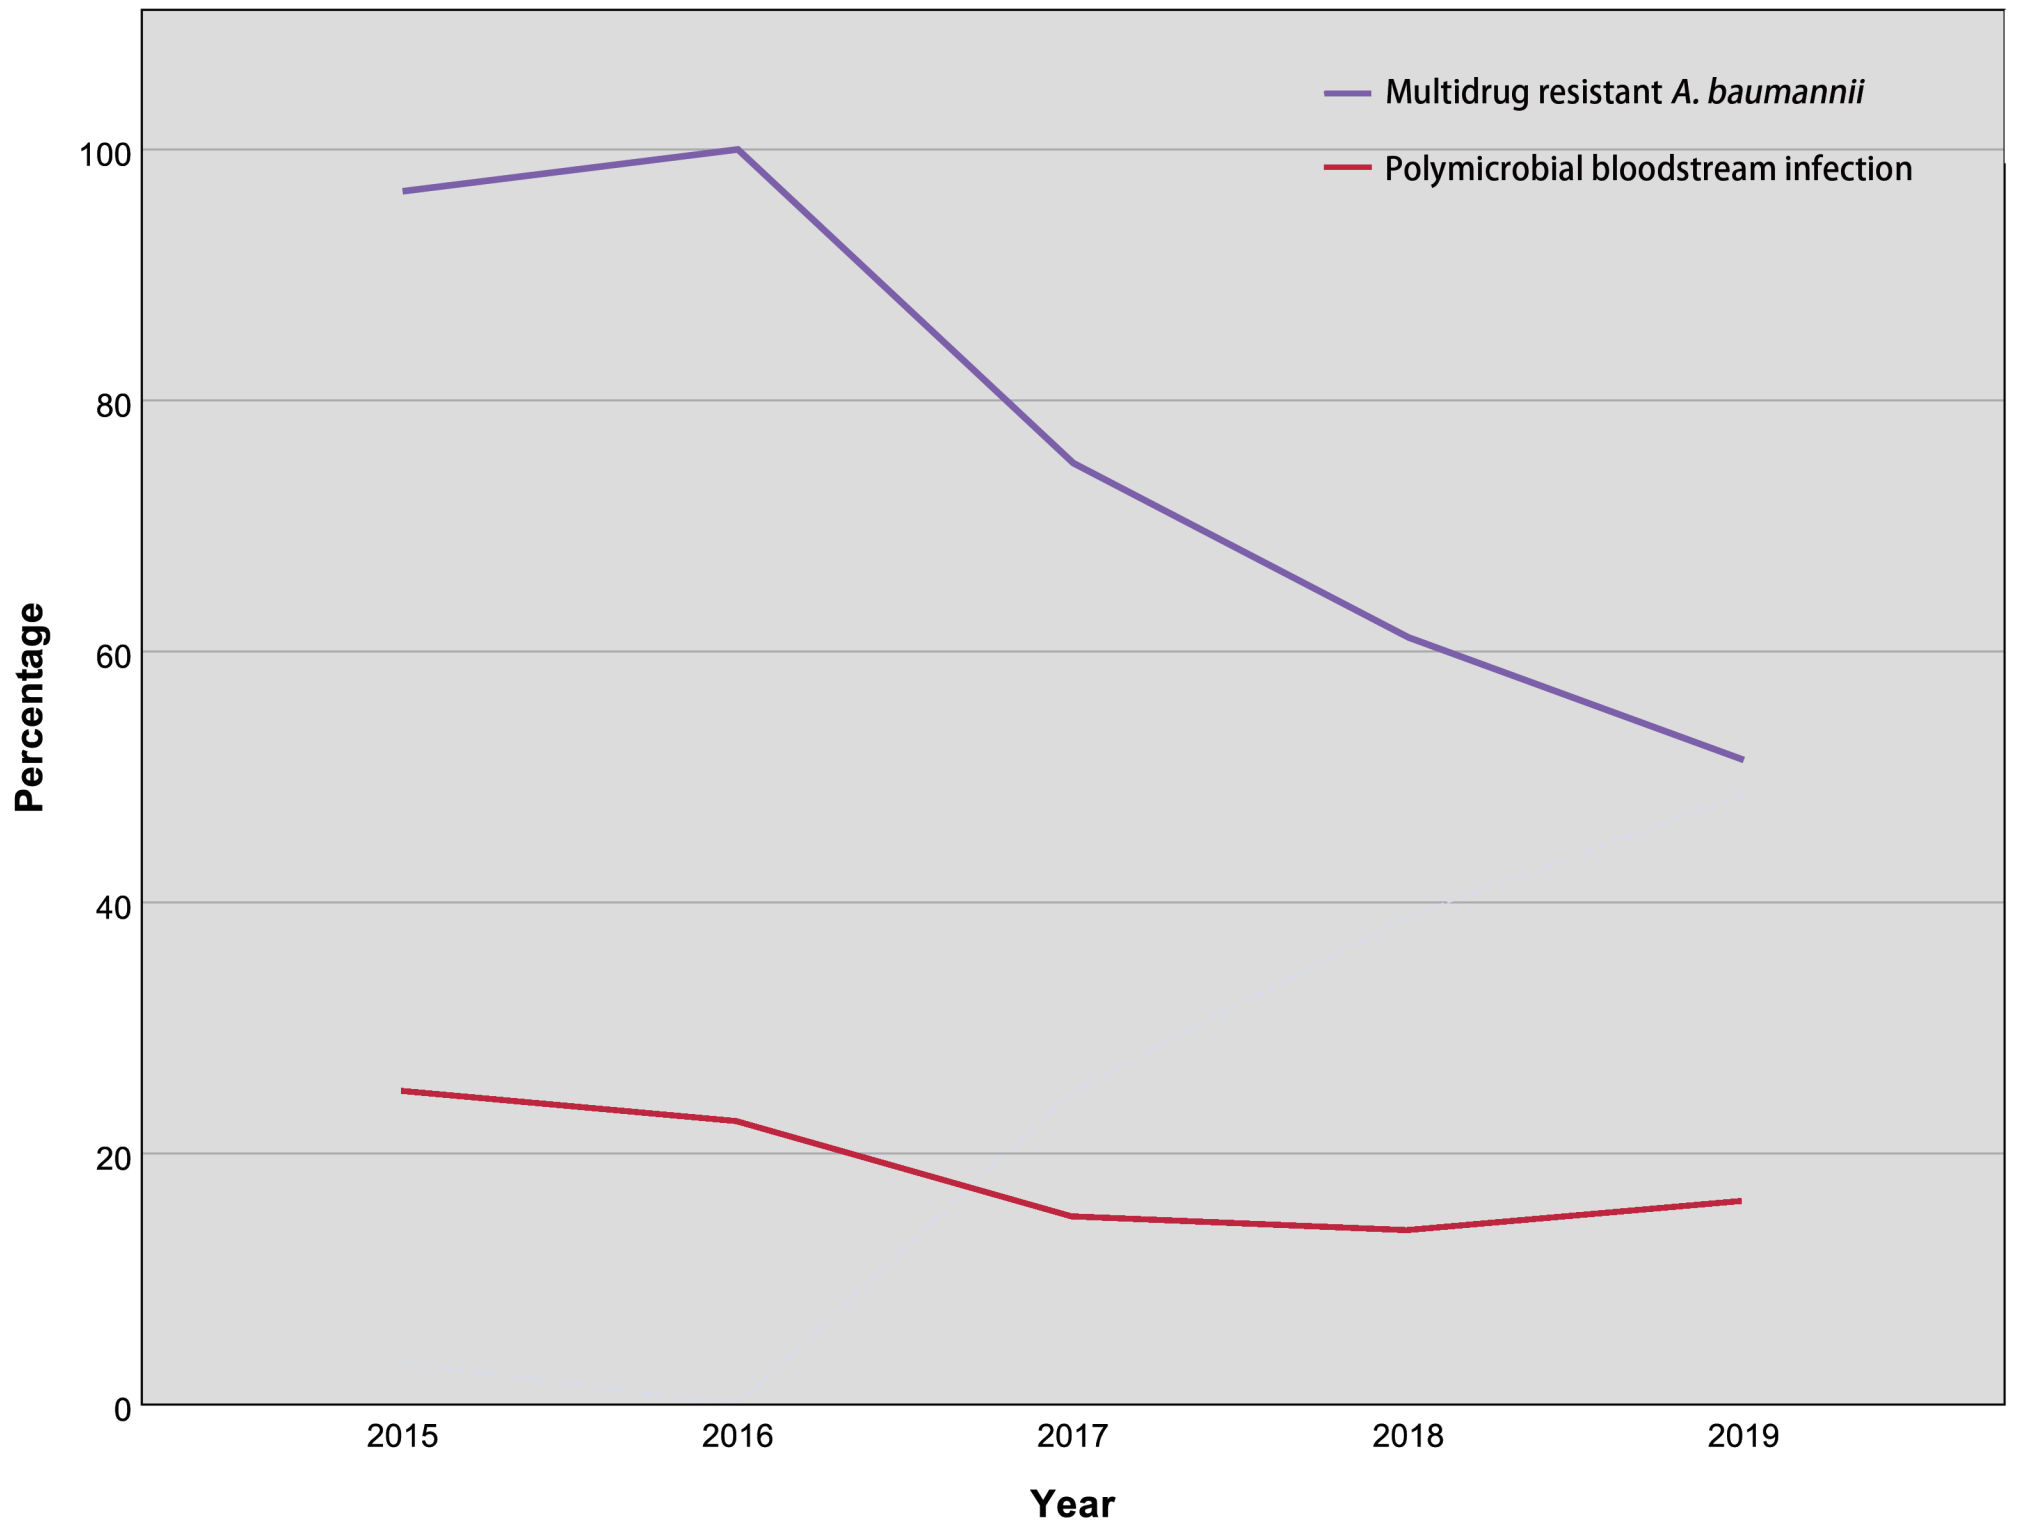

Supplementary Figure 1: Distribution of multi-drug resistant *Acinetobacter baumannii* and polymicrobial bloodstream infections over the years
